# Supplementary material for: Attitudes Toward the Ethics of Research Using Social Media: A Systematic Review
Source: PubMed Central journal article supplement (PMC5478799; doi:10.2196/jmir.7082), 2017-06-06
Supplement: jmir_v19i6e195_app1.pdf [file jmir_v19i6e195_app1.pdf]

## **Appendix 1: Sources Searched**

The sources searched are listed below;

### ***Databases***

ACM Digital Library

ASSIA

CINAHL

Conference Proceedings Citation Index – Science

Conference Proceedings Citation Index – Social Science & Humanities

Embase

Google

Google Scholar

Health Management Information Consortium (HMIC)

INSPEC Direct

[LISTA \(Library, Information Science & Technology Abstracts\)](#)

MEDLINE (including PubMed)

OpenGrey

Proquest Dissertations & Theses: UK & Ireland

PsycINFO

Science Citation Index (SCI)

Social Science Citation Index (SSCI)

Zetoc

### ***Handsearching of Journals***

Journal of Medical Internet Research

### ***Handsearching of Conference Proceedings***

International AAAI Conference on Weblogs and Social Media (ICWSM)

Ethics and Social Media Research (Conference)
