# Supplementary material for: Attitudes Toward the Ethics of Research Using Social Media: A Systematic Review
Source: PubMed Central journal article supplement (PMC5478799; doi:10.2196/jmir.7082), 2017-06-06
Supplement: jmir_v19i6e195_app2.pdf [file jmir_v19i6e195_app2.pdf]

## Appendix 2: Embase Search Strategy

Database: Embase <1974 to 2016 January 27>

Search Strategy:

---

- 1 social media.ti,ab,kw. (3664)
- 2 social medias.ti,ab,kw. (31)
- 3 web 2\*.ti,ab,kw. (1566)
- 4 blog\*.ti,ab,kw. (1522)
- 5 wiki.ti,ab,kw. (495)
- 6 wikis.ti,ab,kw. (174)
- 7 weblog\*.ti,ab,kw. (107)
- 8 web log\*.ti,ab,kw. (69)
- 9 facebook.ti,ab,kw. (1960)
- 10 face book.ti,ab,kw. (24)
- 11 tweet.ti,ab,kw. (189)
- 12 tweets.ti,ab,kw. (374)
- 13 tweeting.ti,ab,kw. (73)
- 14 twitter\*.ti,ab,kw. (1320)
- 15 you tube.ti,ab,kw. (46)
- 16 youtube.ti,ab,kw. (867)
- 17 social web.ti,ab,kw. (48)
- 18 social software.ti,ab,kw. (30)
- 19 social medium.ti,ab,kw. (17)
- 20 crowd sourcing.ti,ab,kw. (98)
- 21 crowdsourcing.ti,ab,kw. (287)
- 22 instant messaging.ti,ab,kw. (175)
- 23 microblogging.ti,ab,kw. (76)
- 24 social bookmark\*.ti,ab,kw. (47)
- 25 patientslikeme.ti,ab,kw. (74)
- 26 patient forum\*.ti,ab,kw. (54)
- 27 discussion forum\*.ti,ab,kw. (704)
- 28 online forum\*.ti,ab,kw. (302)
- 29 on line forum\*.ti,ab,kw. (21)
- 30 chat forum\*.ti,ab,kw. (19)
- 31 chatforum\*.ti,ab,kw. (1)
- 32 chatroom\*.ti,ab,kw. (68)
- 33 chat room\*.ti,ab,kw. (317)
- 34 (online adj2 discussion\*).ti,ab,kw. (551)
- 35 (on line adj2 discussion\*).ti,ab,kw. (137)
- 36 discussion board\*.ti,ab,kw. (281)
- 37 online chat\*.ti,ab,kw. (107)
- 38 on line chat\*.ti,ab,tw. (4)
- 39 (online adj2 communication\*).ti,ab,kw. (378)
- 40 (on line adj2 communication\*).ti,ab,kw. (38)
- 41 digital media.ti,ab,kw. (300)
- 42 digital medias.ti,ab,kw. (1)
- 43 personal health message\*.ti,ab,kw. (3)
- 44 user comment\*.ti,ab,kw. (54)
- 45 patient\* posts.ti,ab,kw. (3)
- 46 user\* posts.ti,ab,kw. (7)
- 47 internet accounts.ti,ab,kw. (6)
- 48 internet sites.ti,ab,kw. (610)
- 49 message board\*.ti,ab,kw. (165)
- 50 web scale.ti,ab,kw. (16)
- 51 google plus.ti,ab,kw. (10)
- 52 user generated.ti,ab,kw. (225)
- 53 consumer generated.ti,ab,kw. (22)
- 54 online health content.ti,ab,kw. (8)
- 55 on line health content.ti,ab,kw. (0)
- 56 internet narrative\*.ti,ab,kw. (9)
- 57 social network\* site\*.ti,ab,kw. (696)
- 58 online social network\*.ti,ab,kw. (356)
- 59 on line social network\*.ti,ab,kw. (8)

60 social networking.ti,ab,kw. (1800)  
61 on line comment\*.ti,ab,kw. (3)  
62 online comment\*.ti,ab,kw. (56)  
63 internet forum\*.ti,ab,kw. (178)  
64 web forum\*.ti,ab,kw. (54)  
65 internet media.ti,ab,kw. (41)  
66 web media.ti,ab,kw. (5)  
67 sentiment analysis.ti,ab,kw. (66)  
68 Social Media/ (5191)  
69 Crowdsourcing/ (363)  
70 or/1-69 (16003)  
71 exp ethics/ (231165)  
72 (ethics or ethic or ethical).ti,ab,kw. (121995)  
73 (moral adj2 (policy or principle\*)).ti,ab,kw. (469)  
74 informed consent.ti,ab,kw. (50944)  
75 anonymity.ti,ab,kw. (2108)  
76 anonymous.ti,ab,kw. (22303)  
77 privacy.ti,ab,kw. (11829)  
78 confidential\*.ti,ab. (16531)  
79 intellectual property.ti,ab,kw. (2292)  
80 Confidentiality/ (23824)  
81 Privacy/ (11178)  
82 morality/ (28708)  
83 or/71-82 (355738)  
84 70 and 83 (1735)  
85 interview\$.ti,ab. (309675)  
86 qualitative.ti,ab. (173080)  
87 experience\$.ti,ab. (1052070)  
88 themes.ti,ab. (44561)  
89 questionnaire\*.ti,ab. (486945)  
90 ethnograph\*.ti,ab. (7656)  
91 fieldwork.ti,ab. (2415)  
92 field work.ti,ab. (1158)  
93 key informant.ti,ab. (2385)  
94 focus group\*.ti,ab. (32525)  
95 (("semi-structured" or semistructured or unstructured or informal or "in-depth" or indepth or "face-to-face" or structured or guide) adj3 discussion\*).ti,ab. (2977)  
96 qualitative analysis/ (39429)  
97 qualitative research/ (34163)  
98 exp interview/ (181127)  
99 exp questionnaire/ (474801)  
100 survey\$.ti,ab. (561744)  
101 discourse analysis/ (638)  
102 (discourse adj2 (analysis or stud\*)).ti,ab. (1393)  
103 observational study/ (83934)  
104 exp observational method/ (2441)  
105 (observational adj2 (analysis or stud\*)).ti,ab. (104134)  
106 or/85-105 (2391541)  
107 84 and 106 (795)
