# Supplementary material for: Attitudes Toward the Ethics of Research Using Social Media: A Systematic Review
Source: PubMed Central journal article supplement (PMC5478799; doi:10.2196/jmir.7082), 2017-06-06
Supplement: jmir_v19i6e195_app5.pdf [file jmir_v19i6e195_app5.pdf]

## Appendix 5: Quality of reporting in included studies

| Source                                    | Question and study design | Selection of participants | Method of data collection | Methods of data analysis |
|-------------------------------------------|---------------------------|---------------------------|---------------------------|--------------------------|
| <b>Researchers as respondents</b>         |                           |                           |                           |                          |
| Alim 2014 [43]                            | Yes                       | Yes                       | Yes                       | No                       |
| Bakardjieva 2001 [56]                     | Yes                       | No                        | No                        | No                       |
| Carter 2015 [68]                          | Yes                       | Yes                       | Yes                       | Yes                      |
| Denecke 2014 [69]                         | Yes                       | Yes                       | No                        | No                       |
| McKee 2009 [70]                           | Yes                       | Yes                       | No                        | No                       |
| Woodfield 2013 [71]<br>/Salmons 2013 [42] | No                        | No                        | No                        | No                       |
| <b>Social media users as respondents</b>  |                           |                           |                           |                          |
| Bond 2013 [40]                            | Yes                       | Yes                       | Yes                       | Yes                      |
| Beninger 2014 [57]                        | Yes                       | Yes                       | Yes                       | No                       |
| Chen 2004 [58]                            | Yes                       | Yes                       | No                        | No                       |
| Evans 2015 [59]                           | Yes                       | No                        | Yes                       | No                       |
| Hudson 2004 [60] /<br>2005 [61]           | Yes                       | Yes                       | No                        | No                       |
| Michaelidou 2016a<br>[62] /2016b [63]     | Yes                       | No                        | No                        | Yes                      |
| Mikal 2016 [64]                           | Yes                       | Yes                       | Yes                       | Yes                      |
| Monks 2015 [65]                           | Yes                       | Yes                       | Yes                       | Yes                      |
| Moreno 2012 [38]                          | Yes                       | Yes                       | Yes                       | Yes                      |
| Peterson 2013 [66]                        | Yes                       | Yes                       | Yes                       | No                       |
| Williams 2015 [67]                        | No                        | No                        | Yes                       | No                       |
