# Supplementary material for: Attitudes Toward the Ethics of Research Using Social Media: A Systematic Review
Source: PubMed Central journal article supplement (PMC5478799; doi:10.2196/jmir.7082), 2017-06-06
Supplement: jmir_v19i6e195_app6.pdf [file jmir_v19i6e195_app6.pdf]

| Source                                   | Researchers                   |                    |                                  |                      | Social media users          |                   |                           |                             | Consent          |                       | Social media site responsibilities |                     |          |                  |
|------------------------------------------|-------------------------------|--------------------|----------------------------------|----------------------|-----------------------------|-------------------|---------------------------|-----------------------------|------------------|-----------------------|------------------------------------|---------------------|----------|------------------|
|                                          | Perceived benefit of research | Type of researcher | Validity of the research methods | Risks to researchers | Risks to social media users | Vulnerable groups | Original purpose of posts | Privacy and self-regulation | Informed consent | Researcher disclosure | Terms of service                   | Site administrators | Legality | Type of platform |
| <b>Researchers as respondents</b>        |                               |                    |                                  |                      |                             |                   |                           |                             |                  |                       |                                    |                     |          |                  |
| Alim 2014                                |                               |                    |                                  | ✓                    | ✓                           | ✓                 |                           | ✓                           | ✓                |                       | ✓                                  |                     | ✓        |                  |
| Bakardjieva 2001                         | ✓                             |                    |                                  |                      | ✓                           |                   | ✓                         | ✓                           | ✓                | ✓                     |                                    |                     | ✓        |                  |
| Carter 2015                              |                               |                    |                                  |                      |                             |                   |                           | ✓                           | ✓                | ✓                     | ✓                                  |                     |          |                  |
| Denecke 2014                             |                               | ✓                  |                                  |                      |                             |                   |                           | ✓                           | ✓                |                       | ✓                                  | ✓                   | ✓        | ✓                |
| McKee 2009                               |                               |                    |                                  | ✓                    | ✓                           | ✓                 | ✓                         | ✓                           | ✓                | ✓                     |                                    |                     | ✓        |                  |
| Woodfield 2013/Salmons 2013              |                               | ✓                  |                                  | ✓                    |                             | ✓                 | ✓                         | ✓                           |                  | ✓                     | ✓                                  |                     |          | ✓                |
| <b>Social media users as respondents</b> |                               |                    |                                  |                      |                             |                   |                           |                             |                  |                       |                                    |                     |          |                  |
| Beninger 2014                            | ✓                             | ✓                  | ✓                                |                      | ✓                           | ✓                 | ✓                         | ✓                           | ✓                | ✓                     | ✓                                  |                     | ✓        | ✓                |
| Bond 2013                                | ✓                             |                    |                                  |                      |                             |                   | ✓                         | ✓                           | ✓                | ✓                     |                                    | ✓                   | ✓        | ✓                |
| Chen 2004                                | ✓                             | ✓                  | ✓                                | ✓                    | ✓                           | ✓                 |                           | ✓                           | ✓                | ✓                     | ✓                                  | ✓                   | ✓        | ✓                |
| Evans 2015                               | ✓                             | ✓                  |                                  |                      |                             | ✓                 |                           | ✓                           |                  | ✓                     | ✓                                  |                     | ✓        |                  |
| Hudson 2004/2005                         |                               |                    |                                  | ✓                    | ✓                           | ✓                 |                           |                             |                  | ✓                     |                                    |                     |          |                  |
| Michaelidou 2016a/2016b                  | ✓                             |                    |                                  |                      |                             | ✓                 |                           | ✓                           | ✓                |                       |                                    |                     | ✓        |                  |
| Mikal 2016                               | ✓                             | ✓                  | ✓                                |                      | ✓                           | ✓                 |                           | ✓                           | ✓                | ✓                     | ✓                                  |                     | ✓        | ✓                |
| Monks 2015                               | ✓                             | ✓                  | ✓                                |                      | ✓                           | ✓                 | ✓                         | ✓                           | ✓                | ✓                     | ✓                                  |                     |          | ✓                |
| Moreno 2012                              | ✓                             |                    |                                  |                      | ✓                           |                   |                           | ✓                           | ✓                |                       |                                    |                     |          |                  |
| Petersen 2013                            | ✓                             |                    |                                  |                      | ✓                           | ✓                 |                           | ✓                           | ✓                | ✓                     |                                    | ✓                   | ✓        |                  |
| Williams 2015                            |                               | ✓                  |                                  |                      |                             |                   |                           | ✓                           | ✓                |                       | ✓                                  |                     |          |                  |

Appendix 6: Results matrix for studies by emerging themes
